# Supplementary material for: Selection for Protein Kinetic Stability Connects Denaturation Temperatures to Organismal Temperatures and Provides Clues to Archaean Life
Source: PubMed Central journal article supplement (PMC4890807; doi:10.1371/journal.pone.0156657), 2016-06-02
Supplement: pone.0156657.s001.pdf [file pone.0156657.s001.pdf]

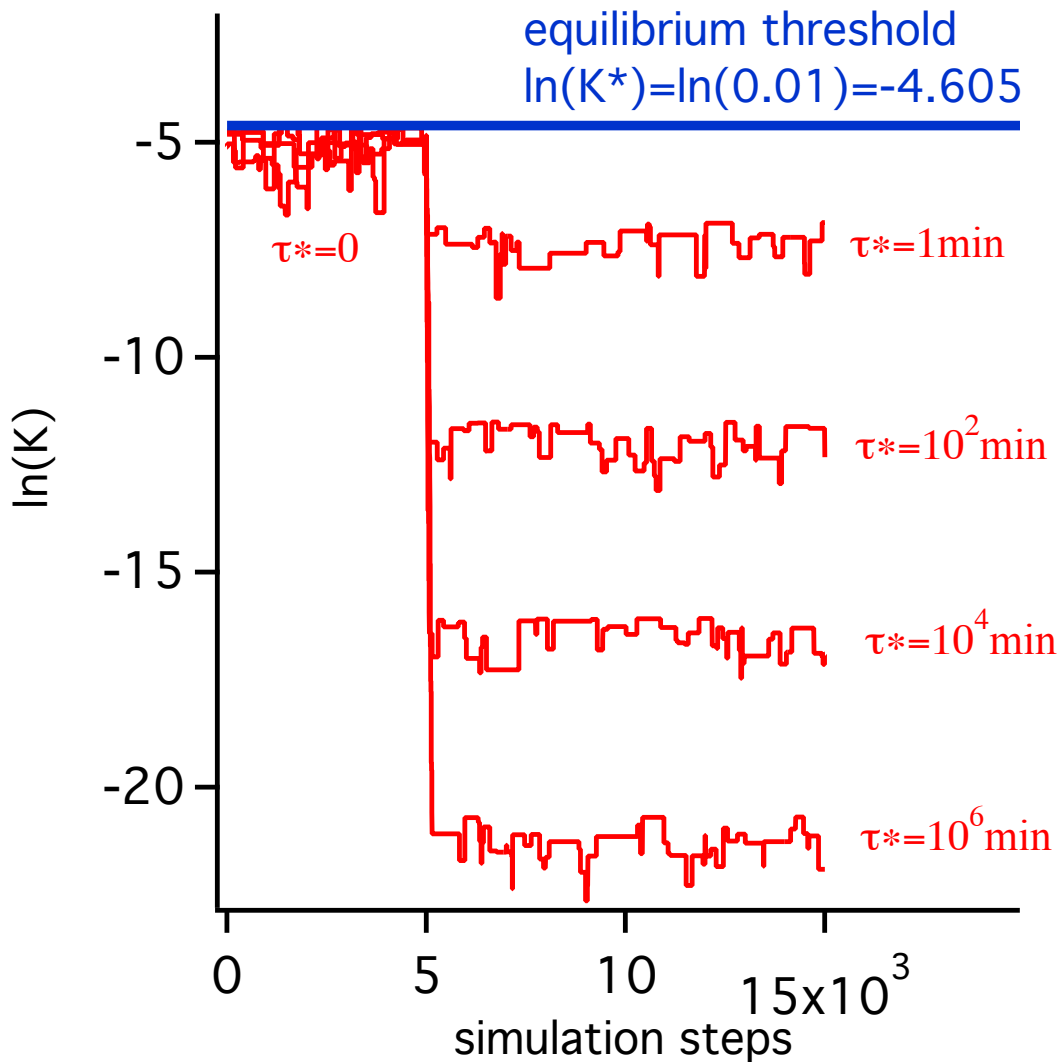

**Fig. S1.** Plot of logarithm of the equilibrium unfolding constant at the environmental temperature (37°C) versus simulation step for the simulations shown in the upper panel of fig. 4 in the main text. The threshold values for the degradation half-life are shown. The plot illustrates the fact that, upon imposition of degradation threshold, the unfolding equilibrium constant is “dragged” to values well below the equilibrium threshold, which, as a result, does not determine the outcome of the simulations.
